# Supplementary material
Source: Copernicus journal article supplement (doi:10.5194/egusphere-2026-3557)
Supplement: Supplementary file 1 [file egusphere-2026-3557-supplement.pdf]

19 **Table S1.** Overview of the CMIP6 Large Ensemble simulations used in this study.

| Model name    | Forcing (Number of Members)                   | Horizontal resolution            |
|---------------|-----------------------------------------------|----------------------------------|
| CanESM5       | Historical (20), SSP2-4.5 (20), SSP5-8.5 (20) | $2.8^{\circ} \times 2.8^{\circ}$ |
| EC-Earth3     | Historical (50), SSP2-4.5 (50), SSP5-8.5 (50) | $0.7^{\circ} \times 0.7^{\circ}$ |
| MPI-ESM1.2-LR | Historical (50), SSP2-4.5 (50), SSP5-8.5 (50) | $1.9^{\circ} \times 1.9^{\circ}$ |

20

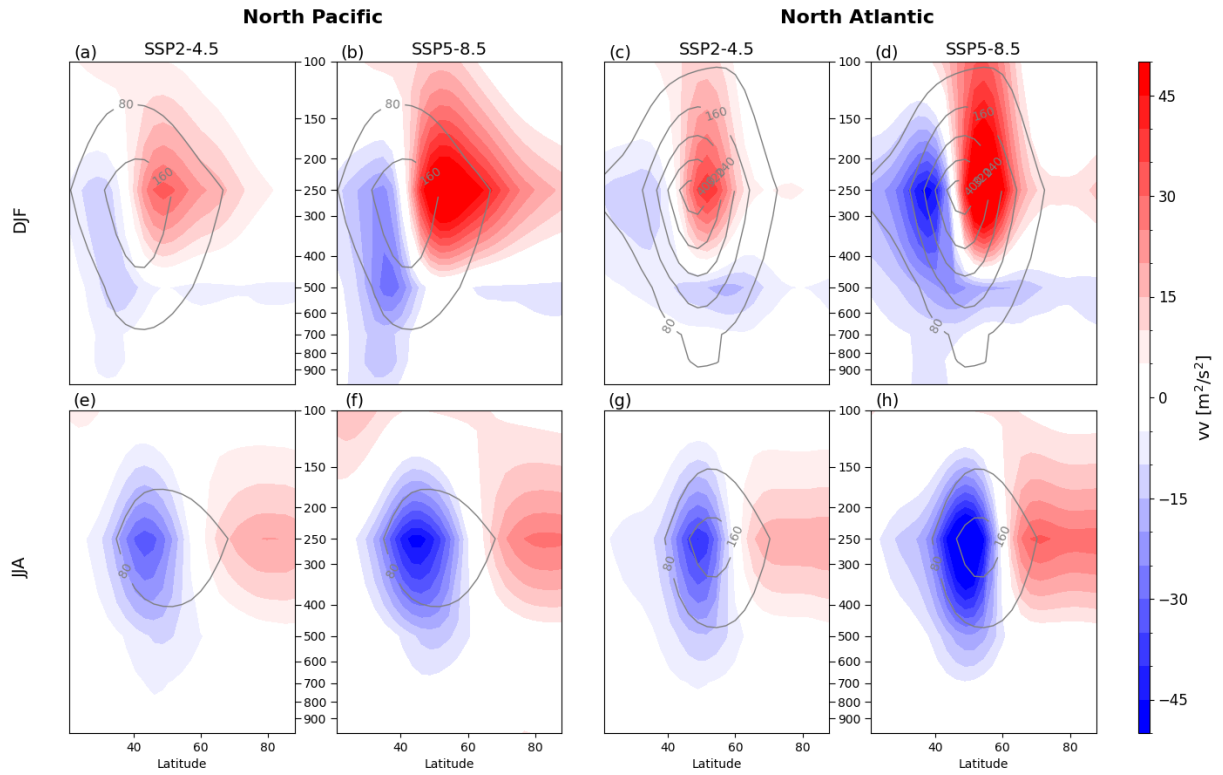

21

**Figure S1.** The zonal mean DJF and JJA  $vv$  changes (2070-2100 minus 1984-2014) for SSP5-8.5 and SSP2-4.5 over the Atlantic and Pacific, using CanESM5 large ensemble. The contour lines show the historical (1984-2014) zonal mean  $vv$  (contour interval:  $80 \text{ m}^2\text{s}^{-2}$ ).

22

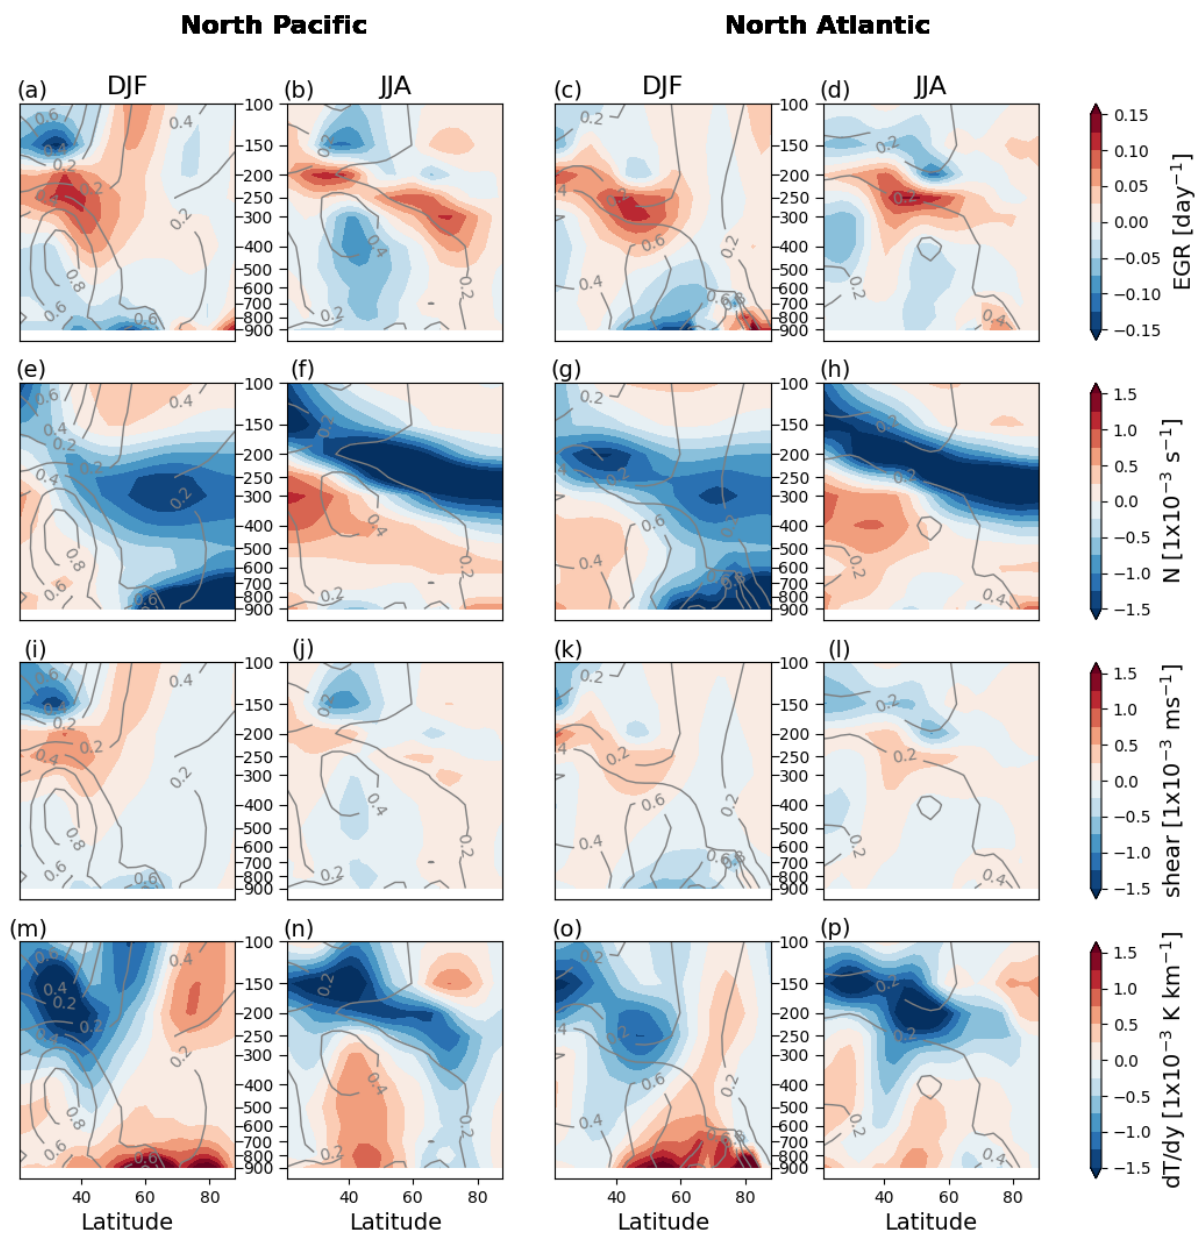

23

**Figure S2.** The DJF and JJA changes (2070-2100 minus 1984-2014) for SSP2-4.5 over the Atlantic and Pacific for (a-d) maximum Eady growth rate (units:  $\text{day}^{-1}$ ), (e-h) Brunt-Vaisala frequency (units:  $\text{s}^{-1}$ ), (i-l) vertical wind shear (units:  $\text{ms}^{-1}$ ), and (m-p) meridional temperature gradient (units:  $\text{K km}^{-1}$ ), using CanESM5 large ensemble. The contours show 1984-2014 zonal means of maximum Eady growth rate (contour interval:  $0.2 \text{ day}^{-1}$ ).

24

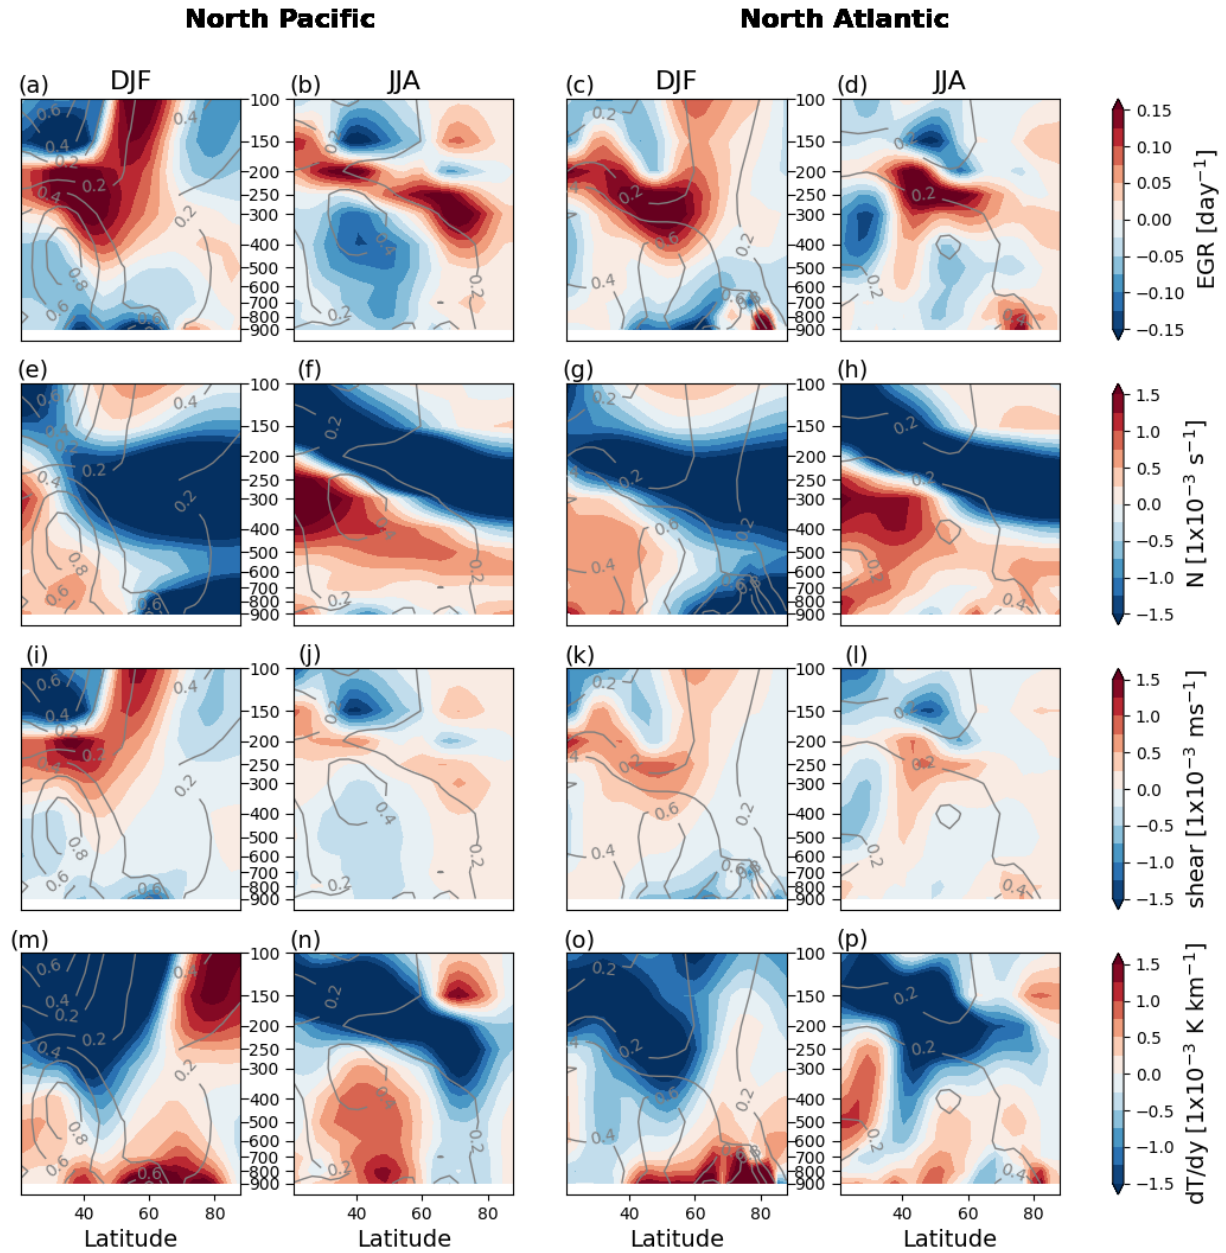

25  
26

Figure S3. Same as Figure S2, but for SSP5-8.5.

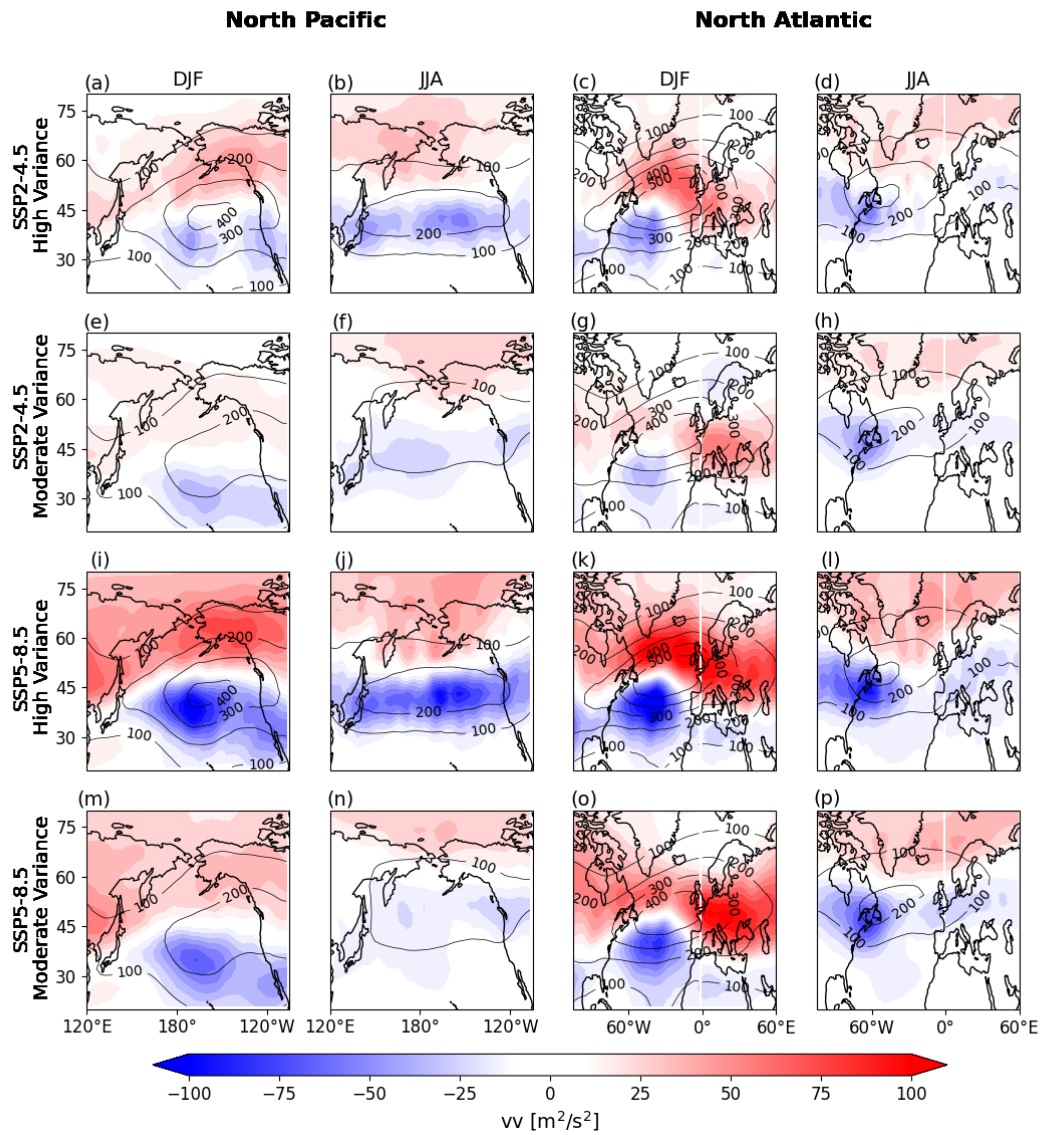

**Figure S4.** The northern hemisphere storm tracks at 250 hPa during high-, and moderate-variance days for DJF and JJA, using CanESM5 large ensemble. The contour lines represent the historical storm track values (contour interval:  $100 \text{ m}^2\text{s}^{-2}$ ).

27

28

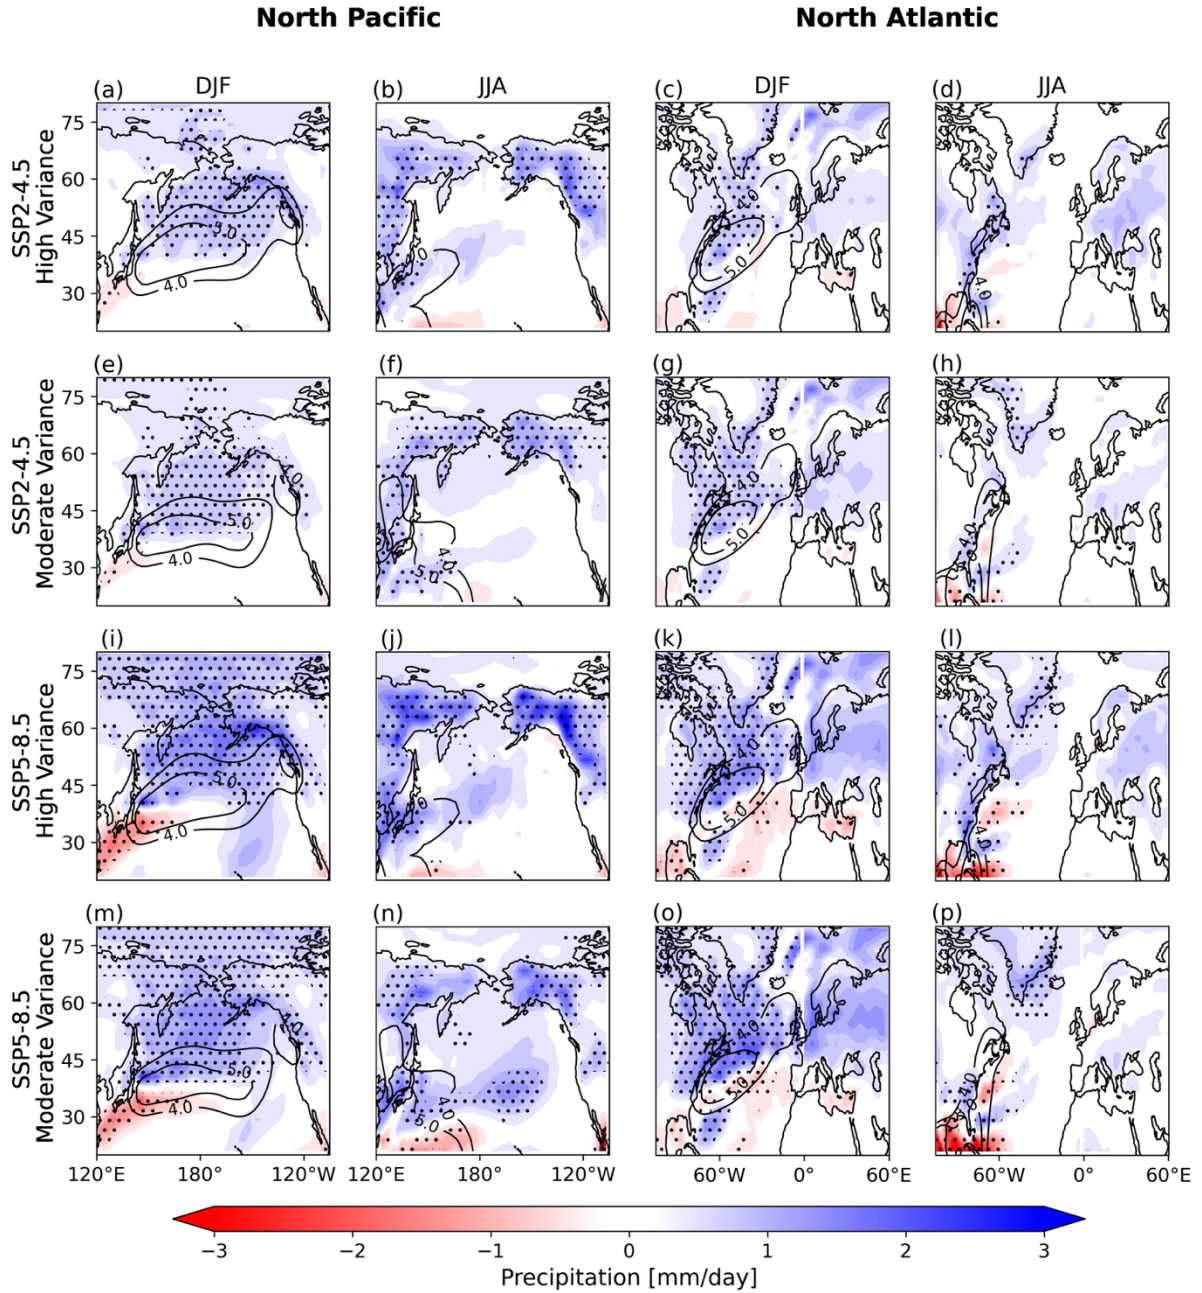

29

**Figure S5.** The northern hemisphere precipitation during high-, and moderate-variance days for DJF and JJA, using CanESM5 large ensemble. The dots indicate areas where more than 70% of the forced precipitation change is attributable to storm track variability. The contour lines represent the historical precipitation values (contour interval: 1.0 mm day<sup>-1</sup>).

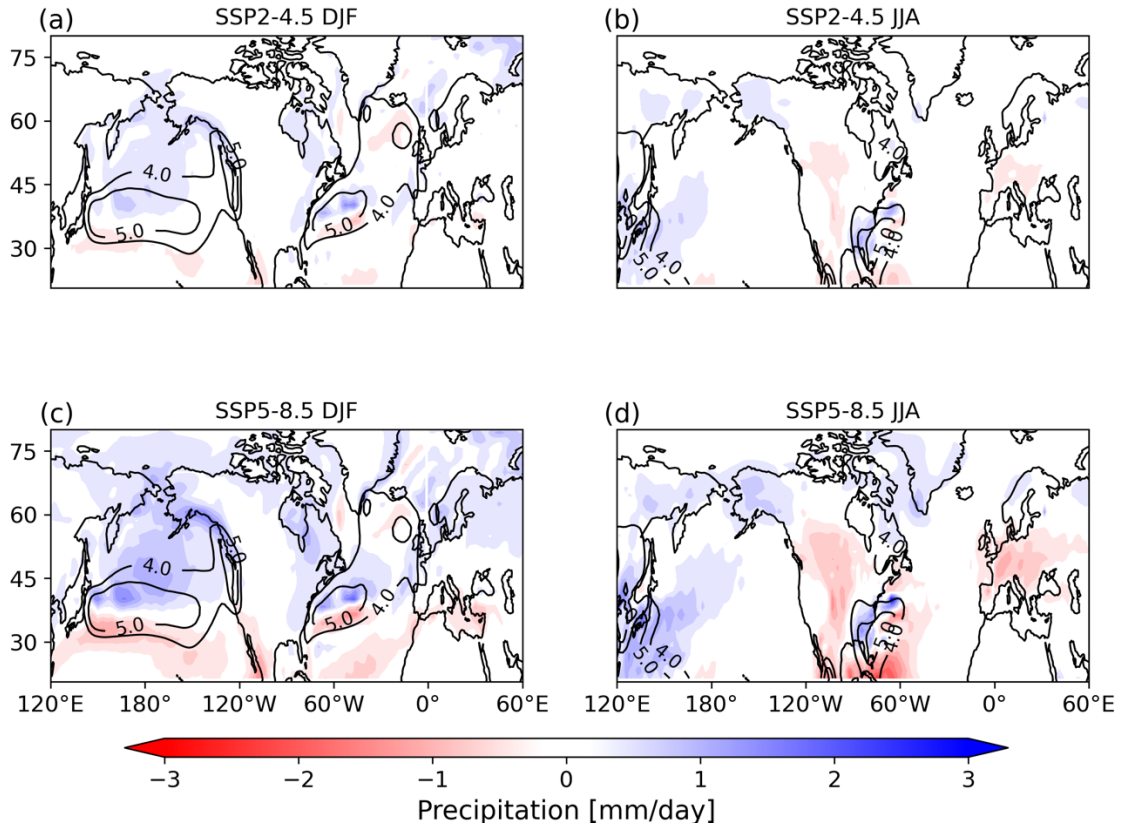

30

**Figure S6.** The northern hemisphere precipitation change for DJF and JJA, using MPI large ensemble. The contour lines represent the historical precipitation values (contour interval: 1.0 mm day<sup>-1</sup>).

31

32
